# Supplementary material for: Political Ideology and Trust in Government Health Agencies for Cancer Information
Source: PubMed Central journal article supplement (PMC10625042; doi:10.1001/jamanetworkopen.2023.41191), 2023-11-03
Supplement: jamanetwopen-e2341191-s001.pdf [file jamanetwopen-e2341191-s001.pdf]

## Data Sharing Statement

Chido-Amajuoyi. Political Ideology and Trust in Government Health Agencies for Cancer Information. *JAMA Netw Open*. Published November 03, 2023.  
doi:10.1001/jamanetworkopen.2023.41191

### Data

**Data available:** No
